1 **Thiamethoxam exposure deregulates short ORF gene expression in the**  
2 **honey bee and compromises immune response to bacteria**

3 Pâmela Decio<sup>1\*</sup>, Pinar Ustaoglu<sup>2\*†</sup>, Kamila Derecka<sup>3</sup>, Daniela Scocchia<sup>2</sup>,  
4 Ian C. W. Hardy<sup>3</sup>, Thaisa C. Roat<sup>1</sup>, Osmar Malaspina<sup>1</sup>, Nigel Mongan<sup>4</sup>,  
5 Reinhard Stöger<sup>3, 5</sup> and Matthias Soller<sup>2, 5</sup>

6

7 <sup>1</sup>Universidade Estadual Paulista (UNESP), Instituto de Biociências, Campus  
8 Rio Claro, São Paulo, Brazil.

9 <sup>2</sup>School of Biosciences, College of Life and Environmental Sciences,  
10 University of Birmingham, Edgbaston, Birmingham, B15 2TT, United Kingdom

11 <sup>3</sup>School of Biosciences, University of Nottingham, LE12 5RD, United  
12 Kingdom

13 <sup>4</sup>School of School of Veterinary Medicine and Science, University of  
14 Nottingham, LE12 5RD, United Kingdom

15

16 **Running title:** Thiamethoxam exposure, short ORFs and bee immunity

17

18 **Key Words:** Neonicotinoid, *Apis mellifera*, anti-microbial peptides,

19 <sup>5</sup>Corresponding authors: [m.soller@bham.ac.uk](mailto:m.soller@bham.ac.uk),

20 [reinhard.stoger@nottingham.ac.uk](mailto:reinhard.stoger@nottingham.ac.uk)

21 \*equally contributing authors

22 Present address: † MRC Centre for Molecular Bacteriology and Infection, and  
23 Department of Life Sciences, Imperial College London, Ground Floor, Flowers  
24 Building, South Kensington Campus, London SW7 2AZ, UK

25

## 26    **Abstract**

27    Maximizing crop yields relies on the use of agrochemicals to control insect  
 28    pests. One of the most widely used classes of insecticides is the  
 29    neonicotinoids but these can also disrupt crop-pollination services provided by  
 30    bees. Here, we analysed the impact of chronic exposure to the neonicotinoid  
 31    thiamethoxam on gene expression and alternative splicing in brains of  
 32    Africanized honey bees, *Apis mellifera*. We find differentially regulated genes  
 33    that show concentration-dependent responses to thiamethoxam. Most have no  
 34    annotated function but encode short Open Reading Frames (sORFs), a  
 35    characteristic feature of anti-microbial peptides. We show that intrinsically sub-  
 36    lethal thiamethoxam exposure makes bees more vulnerable to pathogenic  
 37    bacteria. Our findings imply a synergistic mechanism for the observed bee  
 38    population declines that concern agriculturists, conservation ecologists and the  
 39    public.

40

## 41 INTRODUCTION

42 The western honey bee *Apis mellifera* is highly beneficial for human societies.  
 43 Besides honey production, this semi-domesticated insect plays a critical role  
 44 in sustaining global food security through the provision of managed pollination  
 45 services that contribute to increased yields of many crops. Globally, crop  
 46 productivity is also enhanced by the application of pesticides, including  
 47 insecticides. Agrochemicals are, however, among the key factors implicated in  
 48 contributing to declining bee health and abundance and there is a need to find  
 49 a balance between the necessity of insecticide applications and their  
 50 unintended non-target effects <sup>1–5</sup>.

51 Compared to organophosphate pesticides, neonicotinoids are relatively safe  
 52 for vertebrates and have been one of the most important insecticides for the  
 53 last three decades <sup>6</sup>. Neonicotinoids can be applied to seeds and they then  
 54 spread systemically within growing plants, killing leaf-eating pests. This  
 55 reduces non-target effects compared to spraying but still retains toxic burden  
 56 for pollinators as neonicotinoids continue to be found in wildflowers adjacent  
 57 to treated fields <sup>7</sup>.

58 Neonicotinoids act as agonists, competing with the neurotransmitter  
 59 acetylcholine in binding to nicotinic acetylcholine receptors (nAChR) <sup>8–10</sup>. The  
 60 increased toxicity for insects is thought to be caused by the characteristically  
 61 high nAChR density within insect nervous systems [reviewed in <sup>11</sup>]. Detailed  
 62 knowledge of cellular and molecular effects of insecticide exposure is required  
 63 to mitigate negative effects or refine target specificity. Changes in gene  
 64 expression and processing of RNAs, including alternative splicing, are among  
 65 mechanisms available to an organism to adapt to environmental perturbations

66 <sup>12,13</sup>. Sub-lethal exposure to xenobiotics, such as pesticides, can alter  
67 alternative splicing <sup>14–16</sup>. Since many ion channels and other important  
68 neuronal genes undergo extensive alternative splicing, they are prime targets  
69 for changes induced by xenobiotics <sup>15,17</sup>. Moreover, sub-lethal uptake of some  
70 neonicotinoids affects the honey bee brain, impairing foraging behaviour,  
71 navigation, communication, learning and memory [reviewed in <sup>18–21</sup>].  
72 Neonicotinoid exposure has also been linked to a decline in bee health,  
73 including a reduction of immune competence <sup>22–24</sup>. Insects do not have  
74 antibodies and rely on the innate immune system to fight microbial infections;  
75 both cellular and humoral responses have been identified <sup>25,26</sup>. The cellular  
76 response leading to phagocytosis or encapsulation of pathogens is mediated  
77 by three types of haematopoietic cell lineages <sup>25,27,28</sup>, while the humoral  
78 immune response is activated by Toll and Imd pathways [reviewed in <sup>29</sup>],  
79 leading to the expression of short (10-100 amino acids) antimicrobial peptides  
80 (AMPs) which are highly diverse among insect species <sup>30</sup>. The Toll-pathway is  
81 triggered by Gram-positive bacteria and fungi, ultimately leading to expression  
82 of AMPs that are then secreted from the fat body into the haemolymph <sup>25,31,32</sup>.  
83 The Immune deficiency (Imd) pathway leads to expression of a different set of  
84 AMPs after Gram-negative bacterial infection activates pattern recognition  
85 receptors and a complex intracellular signalling cascade <sup>25,26,31</sup>.  
86 We have previously shown that worker-bee larvae in colonies contaminated  
87 with the neonicotinoid imidacloprid, have altered expression of genes  
88 belonging to lipid-carbohydrate-mitochondrial metabolic networks <sup>33</sup>. We have  
89 further demonstrated that sub-lethal exposure to thiamethoxam, another  
90 neonicotinoid, can cause impairment in the midgut and brain of the

91 Africanized *Apis mellifera*, as well as contribute to a reduction in honey bee  
92 lifespan<sup>34–37</sup>.

93 In this study, we analysed the effects of chronic, sub-lethal, thiamethoxam  
94 exposure on genome-wide gene expression and alternative splicing in the  
95 brains of honey bee workers. We found 52 differentially regulated genes  
96 showing a concentration dependent response to thiamethoxam exposure.  
97 Most of these genes have no annotated function but the vast majority are  
98 characterized by encoding short Open Reading Frames (sORFs), half of  
99 which are predicted to encode antimicrobial peptides. As this suggested that  
100 immune responses may be compromised by thiamethoxam exposure, we  
101 tested found that thiamethoxam-exposed bees that were also infected with  
102 bacteria had greatly decreased viability compared to infected but chemically  
103 unexposed bees. Overall, our results suggest that thiamethoxam makes bees  
104 vulnerable to bacterial infection by compromising immune responses.

105

106

107

## 108 MATERIALS AND METHODS

109 We assessed whether the neonicotinoid thiamethoxam alters gene expression  
110 in the brain of Africanized honey bees, *Apis mellifera*, after long-term  
111 exposure to field-relevant concentrations.

112

### 113 Thiamethoxam exposures

114 Bees from three unrelated hives in the apiary of the Biosciences Institute,  
115 UNESP, Rio Claro-SP (Brazil), were marked with a colour pen at eclosion 15  
116 days later. They were then kept in groups of 20 individuals in small cages  
117 within an incubator at 32° C. Bees were fed *ad libitum* with sugar solution (1:1  
118 water and inverted sugar) for the control treatment (sample A) and, for toxin  
119 exposure treatments, thiamethoxam (Sigma) was added at 2 ng/ml (low dose,  
120 LD, sample B) or at 5 ng/ml (high dose, HD, sample C). After ten days, bees  
121 were cold-anaesthetised and their brains were dissected for RNA extraction.

122

### 123 RNA extraction, Illumina sequencing, analysis of differential gene 124 expression and splicing

125 Total RNA was extracted from ten dissected brains per sample by cracking  
126 the brain in liquid nitrogen, brief homogenization with a pestle in 50 µl of Tri-  
127 reagent (SIGMA) and then, following the manufacturer's instructions, the  
128 volume was increased to 500 µl. Total RNA was then stored in 70% ethanol  
129 and transported at ambient temperature from Brazil to the UK.

130 Total RNA was treated with DNase I (Ambion) and stranded libraries for  
131 Illumina sequencing were prepared after poly(A) selection from total RNA (1  
132 µg) with the TruSeq stranded mRNA kit (Illumina) using random primers for

reverse transcription according to the manufacturer's instructions. Pooled indexed libraries were sequenced on an Illumina HiSeq2500 to yield 28–41 million paired-end 125 bp reads for three control, three low dose and three high dose samples. After demultiplexing, sequence reads were aligned to the *Apis mellifera* genome (Amel-4.5-scaffolds) using Tophat2.0.6<sup>38</sup>. Differential gene expression was determined by Cufflinks-Cuffdiff and the FDR-correction for multiple tests to raw P values with  $p < 0.05$  was considered significant<sup>39</sup>. Illumina sequencing and differential gene expression analysis was carried out by Fasteris (Switzerland). Sequencing data are deposited in GEO under GSE132858 (<https://www.ncbi.nlm.nih.gov/geo/query/acc.cgi?acc=GSE132858> ).

Alternative splicing was analysed by rMATS<sup>40</sup> and manually inspected by uploading bam files into the Integrated Genome Viewer<sup>41</sup> and comparing read frequency. Comparison of gene lists was made with Venny 2.1 (<https://bioinfogp.cnb.csic.es/tools/venny/>). Protein sequences from differentially expressed genes of bees were obtained from ensemble ([http://metazoa.ensembl.org/Apis\\_mellifera/Info/Index](http://metazoa.ensembl.org/Apis_mellifera/Info/Index)) and blasted against *Drosophila* annotated proteins using flybase (<http://flybase.org>) to assign gene functions. Proteins with no assigned functions were scanned for motifs using the Interpro server (<https://www.ebi.ac.uk/interpro/>)<sup>42</sup>. Short ORFs were analysed for antimicrobial peptide prediction using the following server: <https://www.dveltri.com/ascan/v2/ascan.html><sup>43</sup>.

Alternative splicing has been suggested as a mechanism to adapt gene expression to environmental changes<sup>15,44</sup>. We analysed the RNA-seq data for

changes in alternative splicing but found no conclusive patterns  
(Supplementary Information 1; Supplemental table 2).

159

# **Reverse transcription quantitative polymerase chain reaction (RT-qPCR)**

Reverse transcription was carried out with Superscript II (Invitrogen) as  
previously described <sup>45</sup>. PCR was performed as described and PCR products  
were analysed on ethidium bromide stained 3% agarose gels <sup>17</sup>. Neuronal  
genes used as reference for gene expression comparison were *bee erect*  
*wing (ewg)* and *Amyloid Precursor Protein-like (Appl)*, based on expression  
analysis in *Drosophila* <sup>46</sup>. To validate cDNAs obtained from RT, the following  
primers were used to amplify *bee ewg* with AM *ewgG* F  
(CCTGATGGTACCGTATCAATTATTCAAGTTG) and AM *ewgH* R  
(CCGTGTCCATCTTCTCCTGTGAGAATGATTTG), *bee Appl* with AM *Appl* F  
(GCGCGATTCCAGGAACTGTTGCTGCTC) and AM *Appl* R2  
(CTGCTGTCCAGCAGATGTTTGTAATGAG). Additional primers were  
GB45995 (GTTGCATTTTTACGCGTACAGTTACACGACAG) and GB45995  
R (GGGAAATCCCCGGGAAGAGAGCAACTGGAG), GB45995 F  
(GTTGCATTTTTACGCGTACAGTTACACGACAG) and GB45995 R  
(GGGAAATCCCCGGGAAGAGAGCAACTGGAG), and GB47479 F  
(GGGCTATTTGCTATCTAAGTGATCCTCC) and GB47479 R  
(GGGTTTAGGAGTTTTCGTTTTAGCTGCTG) and PCR amplifications were  
done by 30 sec initial denaturation at 94° C, and then 40 cycles in total with  
30 sec at 94° C, annealing at 48° C with 30 sec extension at 72° C for 2  
cycles, then at 50° C with 30 sec extension at 72° C for 2 cycles and then at



181 52° C with and 60 sec extension at 72° C for 36 cycles with a final extension  
182 of 2 min at 72° C.

183 RNA quality and quantification was assessed using an Agilent 6000Nano Kit.  
184 250 ng of DNase-treated RNA (the same samples used for deep seq) was  
185 reversed transcribed using a SuperScript III Invitrogen kit at 55°C, following  
186 manufacturer's instructions. Primers for quantitative real-time PCR (RT-  
187 qPCR) were designed by Primer Express software (exon/exon junctions  
188 included except for GB41813). Amplicon sizes were assessed in 15%  
189 acrylamide gel, PCR products were then sequenced and efficiency of every  
190 pair of primers was included in the analysis.

191 Duplicate samples of cDNA were amplified in Real Time PCR with SybrGreen  
192 chemistry under following conditions: denaturation 93°C for 30 sec, annealing  
193 60°C for 30 sec, elongation 72°C for 30sec. *GB41923* was amplified with  
194 primers *GB41923 F1* (CGCGTTGATCGTCATGATATTG) and *GB41923 R1*  
195 (CTATAAGGAAATTTTGAGCCTTCGA), *GB40669* with primers *GB40669 F1*  
196 (GGCCGGATATCGCTTCAAA) and *GB40669 R1*  
197 (GTCTCTTTTATCTTTTCCTCGGAATTC), and *GB48969* with primers  
198 *GB48969 F1* (TTGCAGCCGTAGCAAAAGGTA), *GB48969 R1*  
199 (ACCGATTTGAGCACCTTGGT) and *bubblegum (bgm, GB51680)* with  
200 primers *bgm F1* (CATGCACAAAGAGTACAAAATTTC) and *bgm R1*  
201 (TGGTCCCAATTCTCCAGTAACA). Analysis of CT values was performed in  
202 Light Cycler480 software and normalization and differential expression was  
203 determined with the  $2^{-\Delta\Delta Ct}$  method <sup>47</sup> by normalizing to the expression of *ewg*,  
204 *Appl* and *actin* genes. *actin* and *ewg* were amplified with primers *ewg Fw2*  
205 (CCGCGTCTCCTACAGCTCTT) and *ewg Rv2*

206 (TGTAAGACTGCCGTAGGATATTGG) and actF1  
 207 (TTCCCATCTATCGTCGGAAGA) and actR1 (TTTGTCCCATGCCAACCAT),  
 208 and *Appl* with primers AM appl F and AM appl R2, following <sup>33,48</sup>.

209

## 210 **Bacterial infection assays**

211 Thiamethoxam-induced alteration of anti-microbial peptide gene expression  
 212 could disrupt bees' immune response. To evaluate the effect of thiamethoxam  
 213 on immunity, we adopted an assay procedure, initially developed for  
 214 *Drosophila*, which assesses how efficiently injected non-pathogenic bacteria  
 215 are cleared by anti-microbial peptides <sup>49</sup>. To assay clearance in bees we used  
 216 *Bacillus badius*, a non-pathogenic bacterium commonly found in the  
 217 environment and *Ochrobactrum anthropi*, which are Gram-negative members  
 218 of the honey bee microbiome <sup>50,51</sup>. *anthropi* were isolated from worker bee gut  
 219 cultures by plating the gut content on LB agar plates incubated at 30° C.

220 Bacterial species were identified by colony PCR and ribosomal 16S  
 221 sequencing: A colony was picked from an LB agar plate with a yellow tip and  
 222 placed into 10 µl TE in a PCR tube and heated to 94° C for 5 min. The PCR  
 223 mix was added adjusting the MgCl concentration to 1.5 mM. PCR was done  
 224 for 20-40 cycles with 54° C annealing for 40 sec and 1 min extension at 72° C.  
 225 A 490 bp fragment of the ribosomal 16S gene was amplified with primers 16S  
 226 F (ACTGAGACACGGYCCAGACTCCTACGTC) and 16S R  
 227 (GCGTGGACTACCAGGGTATCTAATCC) and sequenced with primer 16S  
 228 Fseq (CTCCTACGGGAGGCAGCAGTRGGGTC). If sequences did not yield a  
 229 single species, primers 16S F2 (GTGGACTACCAGGGTATCTAATCCTG)  
 230 and 16S R2 (CCTACGGTTACCTTGTTACGACTTCAC) were used for

231 amplification of a 733 bp fragment, which was sequenced by 16S R2seq  
 232 (CCATGGTGTGACGGGCGGTGTGTAC).

233 Forager honey bees for infection assays were collected from colonies of the  
 234 Winterbourne Garden of the University of Birmingham (UK). They were kept  
 235 and injected with bacteria as we described previously <sup>17</sup>. Bacteria for  
 236 injections were freshly plated and grown overnight on LB plates. Then a single  
 237 colony was used to inoculate a 5 ml LB in a 50 ml Falcon tube and grown  
 238 overnight to saturation: 2 µl of this culture was then injected. Bacterial titres of  
 239 cultures were determined at the time of injections by plating 100 µl of 10<sup>5</sup>, 10<sup>6</sup>  
 240 and 10<sup>7</sup> dilutions in LB and counting the colonies the next day: this showed  
 241 that 2-8 x 10<sup>6</sup> *B. badius* or *O. anthropi* were typically injected. In some  
 242 treatments the injected bacteria were diluted 10-fold (Fig. 3). Groups of 8 to  
 243 12 bees were exposed to combinations of bacterial and thiamethoxam doses  
 244 and survival was assessed at 24 hours and 48 hours.

245

## 246 RESULTS

### 247 Chronic thiamethoxam exposure effects gene expression

248 After low (LD) and high dose (HD) exposure to thiamethoxam, there were 222  
249 up- and 181 down-regulated genes for LD (Fig. 1a) and 233 up- and 114  
250 down-regulated genes for HD with a 1.5 fold difference in expression  
251 compared to the control treatment (Fig. 1b; Supplemental Table 1). From  
252 these differentially regulated genes, 37 were up-regulated and 15 were down-  
253 regulated in a dose-sensitive manner (Fig. 1; Supplemental Table 1).

254 To validate these results from the Illumina sequencing, we performed RT-  
255 qPCR for three of the dose-responsive genes: *GB41923*, a putative sodium-  
256 chloride co-transporter, and *GB48969*, *GB40669*, two genes with unknown  
257 function. We detected an expression difference for all three genes upon  
258 thiamethoxam exposure (Supplemental Fig. 1). We also validated and  
259 confirmed differential expression of *bubblegum*, encoding a very long-chain  
260 acyl-CoA synthetase, which has been found to be down-regulated in honey  
261 bee larvae exposed to the neonicotinoid imidacloprid<sup>33</sup> (Supplemental Fig. 1).

262

### 263 Dose-responsive expression occurs mostly in genes encoding 264 uncharacterized ORFs

265 Next, we categorized the genes dose-responsive to thiamethoxam according  
266 to their functions, taking into account known functions of orthologues in  
267 *Drosophila* and functions deduced from annotated protein domains retrieved  
268 by BLAST analysis. Amongst the dose-sensitive genes that were up-regulated  
269 (Fig. 1A), 14 % (5/37) were assigned roles in cellular signalling (with potential  
270 links to altered neuronal function, such as olfactory and taste perception) and

as structural components (cytoskeleton), and 8 % (3/37) were assigned functions in transcriptional regulation of gene expression (Fig. 2A). However, 59% (22/37) of dose-sensitive up-regulated genes and 73 % (11/15) of dose-sensitive down-regulated genes had neither clear orthologues in *Drosophila* nor any recognizable protein domains that would indicate a biological function (Fig. 2A), which is in contrast to about 20% of genes with unknown function in gene expression studies in *Drosophila*,<sup>52,53</sup>.

### **Most thiamethoxam dose-responsive genes encode short proteins**

Many of the dose-responsive, differentially expressed genes with unknown function coded for short ORFs. For thiamethoxam-induced differentially up- and down-regulated genes, respectively 73 % (27/37) and 87 % (13/15) encode for genes with ORFs of 250 amino acids or shorter (Fig. 2). Using a machine learning algorithm<sup>43</sup>, we predicted the 40 genes coding for peptides of ≤250 amino acids, 17 (43 %), the peptides have antimicrobial function (11/17 genes were up-regulated and 6/17 were down-regulated, Fig. 2).

### **Thiamethoxam makes worker bees more vulnerable to bacterial infection**

When saturated liquid cultures (2-8 Mio bacteria in 2 µl) of *B. badius* and *O. anthropi* were injected into bees that were not exposed to thiamethoxam, viability was affected significantly but not greatly, indicating that the bee immune system usually clears the infection efficiently (Fig. 3, Table 1). In contrast, injection of normally sub-lethal doses of thiamethoxam together with either *B. badius* and *O. anthropi* frequently resulted in bee death (Fig. 3, Table

1). After 48 hours a positive interaction effect between thiamethoxam dose and bacterial dose was detected (Table 1). We conclude that thiamethoxam negatively affects bees' abilities to cope with natural immuno-challenges, which would not normally prove fatal.

## DISCUSSION

A key finding of our analysis of honey bee transcriptomes is the highly enriched fraction of dose-responsive, uncharacterised genes encoding short open reading frames (sORFs). Such sORFs have only recently been recognized to encode functional peptides<sup>54–56</sup>, some of which play important roles during development<sup>57</sup> and the majority of the dose-responsive sORFs we have identified are predicted to encode peptides with antimicrobial function. The sORFs we identified have not been reported in prior whole-transcriptome evaluations of neonicotinoid exposure in bee brains<sup>16,58,59</sup>. The main methodological difference is that we analysed changes after long-term, low dose exposure, while prior studies used shorter exposures. However, we note that other studies infecting bees with viruses of *Nosema*, a unicellular parasite of bees, found an overrepresentation of genes with known function in immune and defence processes, where expression is altered upon exposure to different types of neonicotinoids<sup>16,22,58–60</sup>. Since we did not detect differential expression of known immune genes, the bees in our study were not infected with these known pathogens, but we cannot exclude an impact of other microbiota that are non-pathogenic in healthy bees.

Bees, including *Apis mellifera*, are characterised by their limited set of canonical immune genes, compared to non-social insects, such as the fruit fly *D. melanogaster*<sup>61–63</sup>. Currently, only six antimicrobial-peptide genes

321 comprising four gene families have been described in honey bees <sup>63</sup>. In  
322 contrast, *Drosophila* has 20 antimicrobial-peptide genes comprising eight  
323 gene families <sup>25,63</sup>. From these genes, only *defensin* is conserved between  
324 honey bees and *Drosophila*, consistent with the idea that antimicrobial  
325 peptides evolve fast to adapt to species-specific environmental conditions <sup>30</sup>.  
326 Given the low number of known antimicrobial peptides in bees, it is  
327 conceivable that new (currently uncharacterised) genes encoding  
328 antimicrobial peptides are evolving. Alternatively, the short ORFs that we  
329 found to be differentially expressed upon chronic low dose thiamethoxam  
330 exposure might form a basal immune defence, similar to the antimicrobial  
331 environment present in saliva containing antimicrobial peptides in many  
332 animal species. However, antimicrobial peptides have also been identified in  
333 having a role in learning and memory in *Drosophila* <sup>64</sup>.  
334 Various agrochemicals have been shown to alter the gut microbiome <sup>65,66</sup>. Our  
335 results are consistent with previous findings where neonicotinoid exposure  
336 adversely affects insect immunity <sup>66,67</sup>. Specifically, we have shown that  
337 immune challenges from what are normally non-pathogenic bacteria become  
338 fatal to bees when combined with thiamethoxam exposure.  
339 We note that pathogens can enter bee haemolymph through punctures  
340 inflicted by *Varroa destructor* mites <sup>51</sup> and thus there may be considerable  
341 mortality within hives infested with *Varroa* and also exposed to thiamethoxam.  
342 In summary, the most prominent changes in gene expression upon long-term  
343 low-dose thiamethoxam exposure identified mostly genes that encode short  
344 ORFs, around half of which are predicted to code for antimicrobial peptides.  
345 Furthermore, thiamethoxam exposure reduced the capacity of bees to

346 withstand microbial infection. Taken together, these findings imply that low  
347 doses of neonicotinoids may be intrinsically sub-lethal to bees but can be  
348 ultimately fatal via a weakened immune response to extrinsic pathogens. The  
349 roles of the identified genes in the immune response of bees will need to be  
350 identified to establish how bee immunity might be strengthened to resist  
351 bacterial infections.

352

### 353 **Authors' contributions**

354 P.D., K.D. and D.S. performed the experiments, T.C.R, I.C.W.H., O.M., N.M.  
355 analysed data, R.S. and M.S. supervised experiments and analysed data,  
356 R.S. and M.S. wrote the manuscript with help from P.D., P.U. and I.C.W.H.

357

### 358 **Acknowledgments**

359 We thank N. Parker and the Winterbourne garden for bees, N. Parker for bee  
360 suits, V. Soller-Hausmann and K. Nallasivan for help with bee collections. G.  
361 Salmond for bacterial strains, and L. Orsini, E. Davies and I. Hausmann for  
362 comments on the manuscript. For this work we acknowledge funding from the  
363 Foundation for Research Support of the State of São Paulo, FAPESP (2012 /  
364 13370-8; 2014 / 23197-7), the Biotechnology and Biological Sciences  
365 Research Council (BBSRC), the Nottingham Birmingham Fund, and the  
366 Sukran Sinan Memory Fund.



## 367     **References**

- 368     1.     Klein, S., Cabirol, A., Devaud, J.-M., Barron, A. B. & Lihoreau, M. Why  
369             Bees Are So Vulnerable to Environmental Stressors. *Trends Ecol. Evol.*  
370             **32**, 268–278 (2017).
- 371     2.     Steinhauer, N. *et al.* Drivers of colony losses. *Curr. Opin. insect Sci.* **26**,  
372             142–148 (2018).
- 373     3.     Sánchez-Bayo, F. & Wyckhuys, K. A. G. Worldwide decline of the  
374             entomofauna: A review of its drivers. *Biol. Conserv.* **232**, 8–27 (2019).
- 375     4.     Rundlöf, M. *et al.* Seed coating with a neonicotinoid insecticide  
376             negatively affects wild bees. *Nature* **521**, 77–80 (2015).
- 377     5.     Shah, F. M. *et al.* Field evaluation of synthetic and neem-derived  
378             alternative insecticides in developing action thresholds against  
379             cauliflower pests. *Sci. Rep.* **9**, 7684 (2019).
- 380     6.     Tomizawa, M. & Casida, J. E. Neonicotinoid insecticide toxicology:  
381             mechanisms of selective action. *Annu Rev Pharmacol Toxicol* **45**, 247–  
382             268 (2005).
- 383     7.     Wood, T. J. & Goulson, D. The environmental risks of neonicotinoid  
384             pesticides: a review of the evidence post 2013. *Environ. Sci. Pollut.*  
385             *Res. Int.* **24**, 17285–17325 (2017).
- 386     8.     Matsuda, K. *et al.* Neonicotinoids: insecticides acting on insect nicotinic  
387             acetylcholine receptors. *Trends Pharmacol. Sci.* **22**, 573–80 (2001).
- 388     9.     Jeschke, P. & Nauen, R. Neonicotinoids-from zero to hero in insecticide  
389             chemistry. *Pest Manag Sci* **64**, 1084–1098 (2008).
- 390     10.     Crossthwaite, A. J. *et al.* The invertebrate pharmacology of insecticides  
391             acting at nicotinic acetylcholine receptors. *J. Pestic. Sci.* **42**, 67–83

- 392 (2017).
- 393 11. Gauthier, M. State of the Art on Insect Nicotinic Acetylcholine Receptor  
394 Function in Learning and Memory. in 97–115 (Springer, New York, NY,  
395 2010). doi:10.1007/978-1-4419-6445-8\_9
- 396 12. Nilsen, T. W. & Graveley, B. R. Expansion of the eukaryotic proteome  
397 by alternative splicing. *Nature* **463**, 457–63 (2010).
- 398 13. Pai, A. A. & Luca, F. Environmental influences on RNA processing:  
399 Biochemical, molecular and genetic regulators of cellular response.  
400 *Wiley Interdiscip. Rev. RNA* **10**, e1503 (2019).
- 401 14. Sumanasekera, C., Watt, D. S. & Stamm, S. Substances that can  
402 change alternative splice-site selection. *Biochem. Soc. Trans.* **36**, 483–  
403 90 (2008).
- 404 15. Zaharieva, E., Chipman, J. K. & Soller, M. Alternative splicing  
405 interference by xenobiotics. *Toxicology* **296**, 1–12 (2012).
- 406 16. Colgan, T. J. *et al.* Caste- and pesticide-specific effects of neonicotinoid  
407 pesticide exposure on gene expression in bumblebees. *Mol. Ecol.* **28**,  
408 1964–1974 (2019).
- 409 17. Decio, P. *et al.* Acute thiamethoxam toxicity in honeybees is not  
410 enhanced by common fungicide and herbicide and lacks stress-induced  
411 changes in mRNA splicing. *Sci. Rep.* **9**, 19196 (2019).
- 412 18. Cabirol, A. & Haase, A. The Neurophysiological Bases of the Impact of  
413 Neonicotinoid Pesticides on the Behaviour of Honeybees. *Insects* **10**,  
414 344 (2019).
- 415 19. Fischer, J. *et al.* Neonicotinoids Interfere with Specific Components of  
416 Navigation in Honeybees. *PLoS One* **9**, e91364 (2014).

- 417 20. Tison, L. *et al.* Effects of sublethal doses of thiacloprid and its  
418 formulation Calypso<sup>®</sup> on the learning and memory performance of  
419 honey bees. *J. Exp. Biol.* **220**, 3695–3705 (2017).
- 420 21. Williamson, S. M. & Wright, G. A. Exposure to multiple cholinergic  
421 pesticides impairs olfactory learning and memory in honeybees. *J. Exp.*  
422 *Biol.* **216**, 1799–807 (2013).
- 423 22. Brandt, A., Gorenflo, A., Siede, R., Meixner, M. & B  chler, R. The  
424 neonicotinoids thiacloprid, imidacloprid, and clothianidin affect the  
425 immunocompetence of honey bees (*Apis mellifera* L.). *J. Insect Physiol.*  
426 **86**, 40–47 (2016).
- 427 23. Perveen, N. & Ahmad, M. Toxicity of some insecticides to the  
428 haemocytes of giant honeybee, *Apis dorsata* F. under laboratory  
429 conditions. *Saudi J. Biol. Sci.* **24**, 1016–1022 (2017).
- 430 24. Tesovnik, T. *et al.* Immune related gene expression in worker honey  
431 bee (*Apis mellifera carnica*) pupae exposed to neonicotinoid  
432 thiamethoxam and Varroa mites (*Varroa destructor*). *PLoS One* **12**,  
433 e0187079 (2017).
- 434 25. Lemaitre, B. & Hoffmann, J. The Host Defense of *Drosophila*  
435 *melanogaster*. *Annu. Rev. Immunol.* **25**, 697–743 (2007).
- 436 26. Buchon, N., Silverman, N. & Cherry, S. Immunity in *Drosophila*  
437 *melanogaster*--from microbial recognition to whole-organism physiology.  
438 *Nat. Rev. Immunol.* **14**, 796–810 (2014).
- 439 27. Govind, S. Innate immunity in *Drosophila*: Pathogens and pathways.  
440 *Insect Sci.* **15**, 29–43 (2008).
- 441 28. Parsons, B. & Foley, E. Cellular immune defenses of *Drosophila*

- 442 melanogaster. *Dev. Comp. Immunol.* **58**, 95–101 (2016).
- 443 29. Sheehan, G., Garvey, A., Croke, M. & Kavanagh, K. Innate humoral  
444 immune defences in mammals and insects: The same, with  
445 differences ? *Virulence* **9**, 1625–1639 (2018).
- 446 30. Vilcinskas, A. Evolutionary plasticity of insect immunity. *J. Insect*  
447 *Physiol.* **59**, 123–129 (2013).
- 448 31. Ferrandon, D., Imler, J.-L., Hetru, C. & Hoffmann, J. A. The *Drosophila*  
449 systemic immune response: sensing and signalling during bacterial and  
450 fungal infections. *Nat. Rev. Immunol.* **7**, 862–874 (2007).
- 451 32. Kleino, A. & Silverman, N. The *Drosophila* IMD pathway in the activation  
452 of the humoral immune response. *Dev. Comp. Immunol.* **42**, 25–35  
453 (2014).
- 454 33. Derecka, K. *et al.* Transient Exposure to Low Levels of Insecticide  
455 Affects Metabolic Networks of Honeybee Larvae. *PLoS One* **8**, (2013).
- 456 34. Oliveira, R. A., Roat, T. C., Carvalho, S. M. & Malaspina, O. Side-  
457 effects of thiamethoxam on the brain and midgut of the africanized  
458 honeybee *Apis mellifera* (Hymenoptera: Apidae). *Environ. Toxicol.* **29**,  
459 1122–1133 (2014).
- 460 35. Tavares, D. A., Roat, T. C., Carvalho, S. M., Silva-Zacarin, E. C. M. &  
461 Malaspina, O. In vitro effects of thiamethoxam on larvae of Africanized  
462 honey bee *Apis mellifera* (Hymenoptera: Apidae). *Chemosphere* **135**,  
463 370–378 (2015).
- 464 36. Friol, P. S., Catae, A. F., Tavares, D. A., Malaspina, O. & Roat, T. C.  
465 Can the exposure of *Apis mellifera* (Hymenoptera, Apiadae) larvae to a  
466 field concentration of thiamethoxam affect newly emerged bees?

467           *Chemosphere* **185**, 56–66 (2017).

468    37.    Tavares, D. A., Roat, T. C., Silva-Zacarin, E. C. M., Nocelli, R. C. F. &  
469           Malaspina, O. Exposure to thiamethoxam during the larval phase  
470           affects synapsin levels in the brain of the honey bee. *Ecotoxicol.*  
471           *Environ. Saf.* **169**, 523–528 (2019).

472    38.    Kim, D. *et al.* TopHat2: accurate alignment of transcriptomes in the  
473           presence of insertions, deletions and gene fusions. *Genome Biol.* **14**,  
474           R36 (2013).

475    39.    Trapnell, C. *et al.* Differential gene and transcript expression analysis of  
476           RNA-seq experiments with TopHat and Cufflinks. *Nat. Protoc.* **7**, 562–  
477           78 (2012).

478    40.    Shen, S. *et al.* rMATS: Robust and flexible detection of differential  
479           alternative splicing from replicate RNA-Seq data. *Proc. Natl. Acad. Sci.*  
480           **111**, E5593–E5601 (2014).

481    41.    Robinson, J. T. *et al.* Integrative genomics viewer. *Nat. Biotechnol.* **29**,  
482           24–26 (2011).

483    42.    Jones, P. *et al.* InterProScan 5: genome-scale protein function  
484           classification. *Bioinformatics* **30**, 1236–1240 (2014).

485    43.    Veltri, D., Kamath, U. & Shehu, A. Deep learning improves antimicrobial  
486           peptide recognition. *Bioinformatics* **34**, 2740–2747 (2018).

487    44.    Soller, M. Pre-messenger RNA processing and its regulation: a genomic  
488           perspective. *Cell. Mol. Life Sci.* **63**, 796–819 (2006).

489    45.    Koushika, S. P., Soller, M., DeSimone, S. M., Daub, D. M. & White, K.  
490           Differential and Inefficient Splicing of a Broadly Expressed *Drosophila*  
491           *erect wing* Transcript Results in Tissue-Specific Enrichment of the Vital

492 EWG Protein Isoform. *Mol. Cell. Biol.* **19**, 3998–4007 (1999).

493 46. Koushika, S. P., Soller, M. & White, K. The Neuron-Enriched Splicing  
494 Pattern of *Drosophila* erect wing Is Dependent on the Presence of  
495 ELAV Protein. *Mol. Cell. Biol.* **20**, 1836–1845 (2000).

496 47. Livak, K. J. & Schmittgen, T. D. Analysis of Relative Gene Expression  
497 Data Using Real-Time Quantitative PCR and the  $2^{-\Delta\Delta CT}$  Method.  
498 *Methods* **25**, 402–408 (2001).

499 48. Scharlaken, B. *et al.* Reference Gene Selection for Insect Expression  
500 Studies Using Quantitative Real-Time PCR: The Head of the Honeybee,  
501 *Apis mellifera* , After a Bacterial Challenge. *J. Insect Sci.* **8**, 1–10  
502 (2008).

503 49. Nehme, N. T. *et al.* Relative Roles of the Cellular and Humoral  
504 Responses in the *Drosophila* Host Defense against Three Gram-  
505 Positive Bacterial Infections. *PLoS One* **6**, e14743 (2011).

506 50. Engel, P., Martinson, V. G. & Moran, N. A. Functional diversity within  
507 the simple gut microbiota of the honey bee. *Proc. Natl. Acad. Sci. U. S.*  
508 *A.* **109**, 11002–7 (2012).

509 51. Raymann, K. & Moran, N. A. The role of the gut microbiome in health  
510 and disease of adult honey bee workers. *Curr. Opin. Insect Sci.* **26**, 97–  
511 104 (2018).

512 52. Haussmann, I. U., White, K. & Soller, M. Erect wing regulates synaptic  
513 growth in *Drosophila* by integration of multiple signaling pathways.  
514 *Genome Biol.* **9**, R73 (2008).

515 53. Haussmann, I. U. & Soller, M. Differential activity of EWG transcription  
516 factor isoforms identifies a subset of differentially regulated genes

- important for synaptic growth regulation. *Dev. Biol.* **348**, 224–230 (2010).
54. Couso, J.-P. & Patraquim, P. Classification and function of small open reading frames. *Nat. Rev. Mol. Cell Biol.* **18**, 575–589 (2017).
55. Pueyo, J. I., Magny, E. G. & Couso, J. P. New Peptides Under the s(ORF)ace of the Genome. *Trends Biochem. Sci.* **41**, 665–678 (2016).
56. Andrews, S. J. & Rothnagel, J. A. Emerging evidence for functional peptides encoded by short open reading frames. *Nat. Rev. Genet.* **15**, 193–204 (2014).
57. Galindo, I., Pueyo, I., Fouix, S., Bishop, S. A. & Couso, J. P. Peptides Encoded by Short ORFs Control Development and Define a New Eukaryotic Gene Family. **5**, (2007).
58. Christen, V., Schirrmann, M., Frey, J. E. & Fent, K. Global Transcriptomic Effects of Environmentally Relevant Concentrations of the Neonicotinoids Clothianidin, Imidacloprid, and Thiamethoxam in the Brain of Honey Bees ( *Apis mellifera* ). *Environ. Sci. Technol.* **52**, 7534–7544 (2018).
59. Li, Z. *et al.* Brain transcriptome of honey bees (*Apis mellifera*) exhibiting impaired olfactory learning induced by a sublethal dose of imidacloprid. *Pestic. Biochem. Physiol.* **156**, 36–43 (2019).
60. De Smet, L. *et al.* Stress indicator gene expression profiles, colony dynamics and tissue development of honey bees exposed to sub-lethal doses of imidacloprid in laboratory and field experiments. *PLoS One* **12**, e0171529 (2017).
61. Barribeau, S. M. *et al.* A depauperate immune repertoire precedes

542 evolution of sociality in bees. *Genome Biol.* **16**, 83 (2015).

543 62. López-Uribe, M. M., Sconiers, W. B., Frank, S. D., Dunn, R. R. & Tarpy,  
544 D. R. Reduced cellular immune response in social insect lineages. *Biol.*  
545 *Lett.* **12**, 20150984 (2016).

546 63. Evans, J. D. *et al.* Immune pathways and defence mechanisms in  
547 honey bees *Apis mellifera*. *Insect Mol. Biol.* **15**, 645–656 (2006).

548 64. Barajas-Azpeleta, R. *et al.* Antimicrobial peptides modulate long-term  
549 memory. *PLOS Genet.* **14**, e1007440 (2018).

550 65. Motta, E. V. S., Raymann, K. & Moran, N. A. Glyphosate perturbs the  
551 gut microbiota of honey bees. *Proc. Natl. Acad. Sci.* **115**, 10305–10310  
552 (2018).

553 66. Chmiel, J. A., Daisley, B. A., Burton, J. P. & Reid, G. Deleterious Effects  
554 of Neonicotinoid Pesticides on *Drosophila melanogaster* Immune  
555 Pathways. *MBio* **10**, e01395-19 (2019).

556 67. Di Prisco, G. *et al.* Neonicotinoid clothianidin adversely affects insect  
557 immunity and promotes replication of a viral pathogen in honey bees.  
558 *Proc. Natl. Acad. Sci.* **110**, 18466–18471 (2013).

559



**Table 1. Effects of bacterial dose and thiamethoxam dose on bee viability.**

Data on survival were analysed using logistic analyses adopting a logit-link function and assuming quasi-binomial distributed errors. The two species of bacteria did not differ significantly in their effect on bee viability (24h:  $F_{1,7}=1.18$ ,  $P=0.319$ ; 48h:  $F_{1,7}=0.37$ ,  $P=0.566$ ) and bacterial dose was further analysed without species distinction. Bee viability, measured at either 24 hours or 48 hours, was negatively affected by increasing doses of thiamethoxam and of bacteria. At 48 hours after exposure, a synergistic interaction between these main effects was also detected: bee viability declined more rapidly in response to bacterial doses when bees were exposed to higher doses of thiamethoxam, Fig. 3). These analyses were carried out using GenStat v.19 (VSN International, Hemel Hempstead).

| Source                              | Survival after 24 hours |          |       |        | Survival after 48 hours |          |       |        |
|-------------------------------------|-------------------------|----------|-------|--------|-------------------------|----------|-------|--------|
|                                     | d.f.                    | Deviance | F     | P      | d.f.                    | Deviance | F     | P      |
| Bacterial dose                      | 1                       | 73.56    | 27.61 | <0.001 | 1                       | 88.47    | 26.10 | <0.001 |
| Thiamethoxam dose                   | 1                       | 106.12   | 39.83 | <0.001 | 1                       | 70.87    | 20.91 | <0.001 |
| Bacteria × Thiamethoxam interaction | 1                       | 1.79     | 0.67  | 0.418  | 1                       | 18.50    | 5.46  | 0.026  |
| Residual                            | 32                      | 85.27    |       |        | 32                      | 108.47   |       |        |
| Total                               | 35                      | 229.62   |       |        | 35                      | 286.32   |       |        |

## Figure legends

**Figure 1: Thiamethoxam induces differential expression in a subset of genes.** Venn diagrams indicating the number of differentially expressed genes between control bees and bees exposed to a low dose (left) and high dose (right) of thiamethoxam that were up- (A) or down- (B) regulated. 37 genes were up-regulated and 15 genes were down-regulated in a dose-sensitive manner.

**Figure 1**

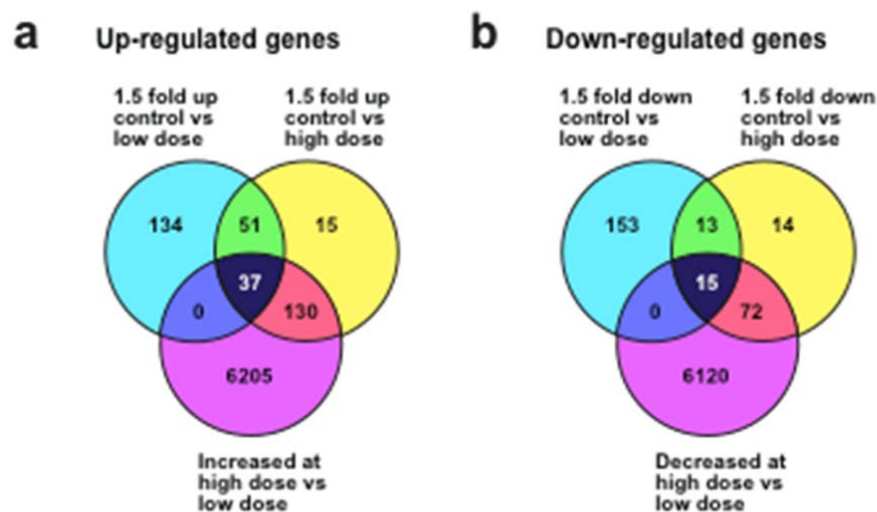

## Figure 2

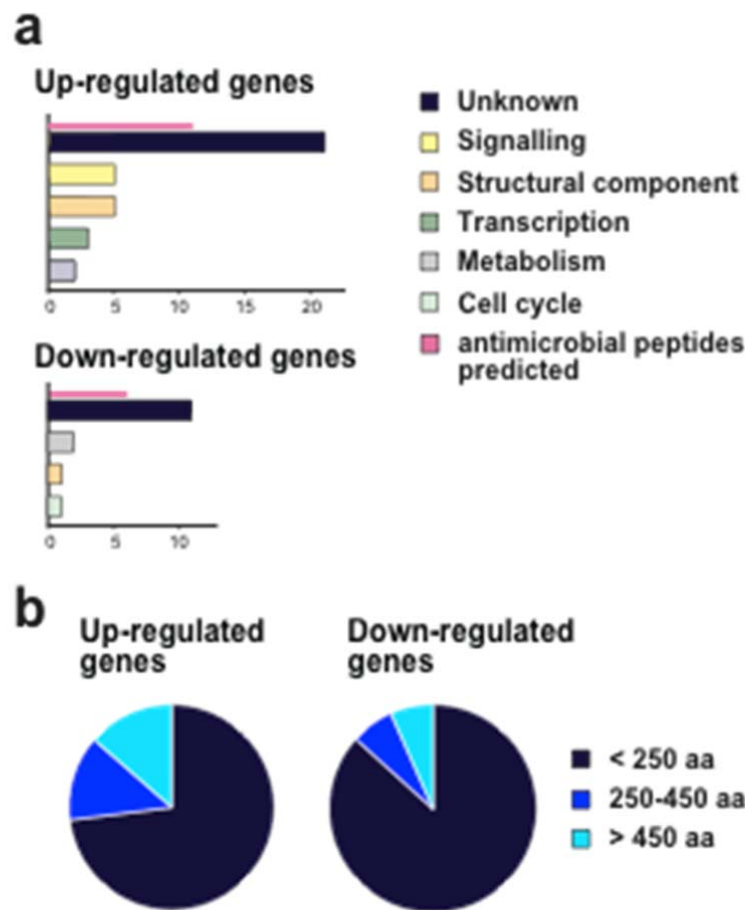

590  
591

592 **Figure 2: Classification of thiamethoxam induced differentially**  
593 **expressed genes according to function and size.** (A) Numbers of genes  
594 are plotted according to functions for thiamethoxam induced differentially  
595 expressed genes with annotated functions for up- (top) and down-regulated  
596 (bottom) genes. (B) Pie charts indicating the fraction of thiamethoxam induced  
597 differentially expressed genes according the ORF length for up- (left) and  
598 down- (right) regulated genes.

**Figure 3**

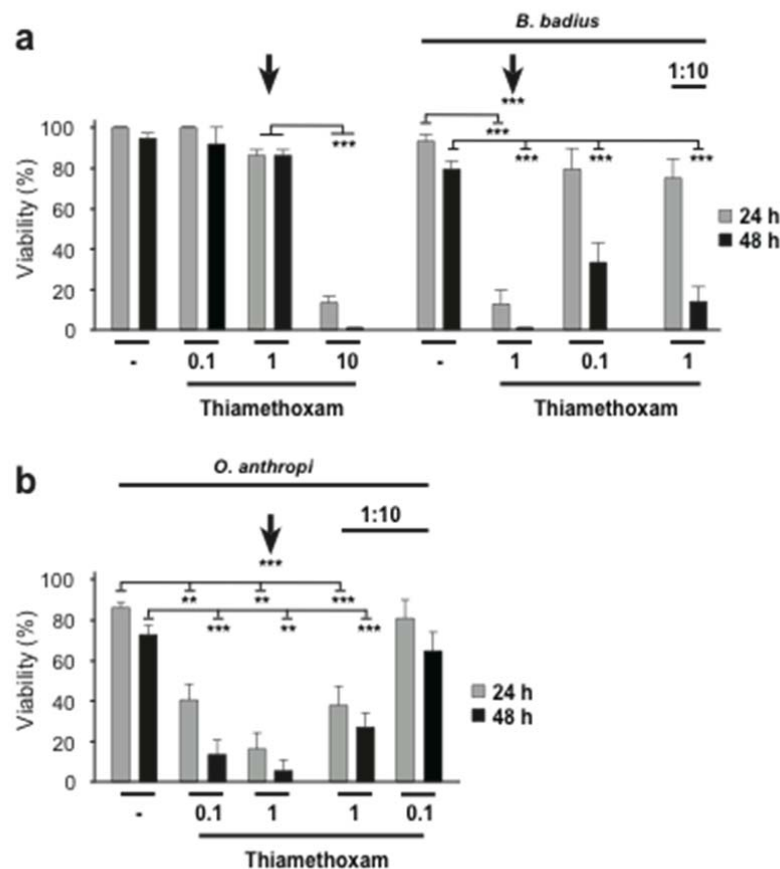

599

600

601 **Figure 3: Thiamethoxam exposure makes bees vulnerable to infection**

602 **by *B. badius* and *O. anthropi*.** Viability of bees 24 h (grey bars) and 48 h

603 (black bars) after injection with *B. badius* (A) or *O. anthropi* (B) ( $2-8 \times 10^6$  and

604 diluted 1:10) alone or together with thiamethoxam (at a range of doses,  $\mu\text{M}$ )

605 shown as means and standard errors. Arrows indicate injection of a 1  $\mu\text{M}$

606 Thiamethoxam solution with (A right and B) or without bacteria (A left).

607 Statistical analyses were carried out in GraphPad prism using ANOVA

608 followed by Tukey-Kramer post-hoc tests. Statistical significance is indicated

609 by \*\* ( $p < 0.01$ ) and \*\*\* ( $p < 0.001$ ).
